# Supplementary material for: Sentinel surveillance in bacterial pneumonia in children under 5 years old in a fourth-level pediatric hospital in Colombia 2016-2022
Source: PubMed Central journal article supplement — IJID Reg. 2024 Sep 17;13:100449. doi: 10.1016/j.ijregi.2024.100449 (PMC11490932; doi:10.1016/j.ijregi.2024.100449), 2024-09-17
Supplement: mmc3.pdf [file mmc3.pdf]

**Figure Legend 1s. Trends in suspected cases of bacterial pneumonia among <5-year-old HOMI-2016-2022 patients**
