# Supplementary figures and images for: Sentinel surveillance in bacterial pneumonia in children under 5 years old in a fourth-level pediatric hospital in Colombia 2016-2022
Source: PubMed Central journal article supplement — IJID Reg. 2024 Sep 17;13:100449. doi: 10.1016/j.ijregi.2024.100449 (PMC11490932; doi:10.1016/j.ijregi.2024.100449), 2024-09-17

Figure 1s.

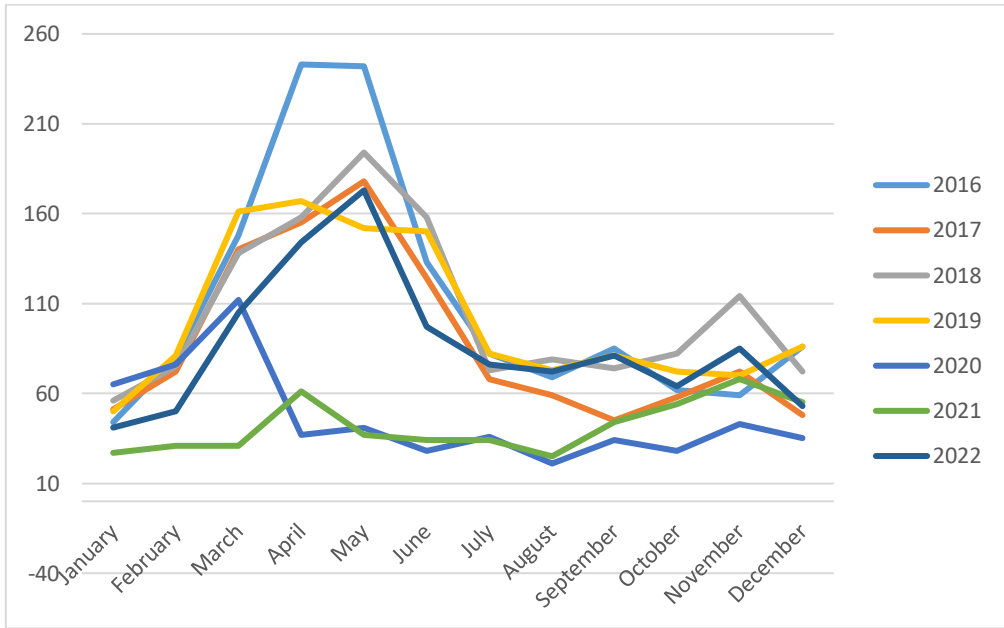

Supplement: mmc2.pdf [file mmc2.pdf]
